# Supplementary material for: Habitual Fish Consumption, n‐3 Fatty Acids, and Nuclear Magnetic Resonance Lipoprotein Subfractions in Women
Source: PubMed Central journal article supplement — J Am Heart Assoc. 2020 Feb 27;9(5):e014963. doi: 10.1161/JAHA.119.014963 (PMC7335538; doi:10.1161/jaha.119.014963), 2020-02-27
Supplement: JAH3-9-e014963-s001.pdf [file JAH3-9-e014963-s001.pdf]

# SUPPLEMENTAL MATERIAL

## Online Supporting Material

### Supplemental Figures and Tables:

Table s1- Particle Diameter ranges.

Table s2- Baseline characteristics of 26034 apparently healthy women according to quintiles (Q) of fish and energy adjusted marine n-3 intake.

Table s3- Baseline characteristics of 26034 apparently healthy women according to quintiles (Q) of energy adjusted ALA, EPA and DHA fatty acid intake.

Table s4- Raw means (or geometrical means) and adjusted means of LDL related variables according to quintiles of energy adjusted EPA intake.

Table s5- Raw means (or geometrical means) and adjusted means of LDL related variables according to quintiles of energy adjusted DHA intake.

Table s6- Raw means (or geometrical means) and adjusted means of LDL related variables according to quintiles of energy adjusted ALA intake.

Table s7- Raw means (or geometrical means) and adjusted means of VLDL related variables according to quintiles of energy adjusted EPA intake.

Table s8- Raw means (or geometrical means) and adjusted means of VLDL related variables according to quintiles of energy adjusted DHA intake.

Table s9- Raw means (or geometrical means) and adjusted means of VLDL related variables according to quintiles of energy adjusted ALA intake.

Table s10- Raw means (or geometrical means) and adjusted means of HDL related variables according to quintiles of energy adjusted EPA intake.

Table s11- Raw means (or geometrical means) and adjusted means of HDL related variables according to quintiles of energy adjusted DHA intake.

Table s12- Raw means (or geometrical means) and adjusted means of HDL related variables according to quintiles of energy adjusted ALA intake.

Table s13- Correspondence between absolute values and per 1% and per 5% differences.

Table s14- Adjusted means for the lower exposure quintiles (Q1) that showed a significant association ( $P_{trend} < 0.05$ ).

**Table s1- Particle diameter ranges.**

|                | Diameter range (nm) | % CV |
|----------------|---------------------|------|
| LDL Particles  |                     |      |
| Total          | 18-23               | 2.1  |
| Large          | 21.2-23             | 6.3  |
| Small          | 18-21.2             | 4.7  |
| IDL Particles  | 23-27               | 13.1 |
| HDL Particles  |                     |      |
| Total          | 7.3-13              | 1.5  |
| Large          | 8.8-13              | 5.9  |
| Medium         | 8.2-8.8             | <30  |
| Small          | 7.3-8.2             | 3.7  |
| VLDL Particles |                     |      |
| Total          | $\geq 27$           | 3.1  |
| Large          | > 60                | 5.1  |
| Medium         | 35-60               | 4.1  |
| Small          | 27-35               | 7.1  |

**Table s2-** Baseline characteristics of 26,034 apparently healthy women according to quintiles of fish and energy adjusted marine n-3 intake.

| Characteristic                                 | Total fish intake (median [min, max] serv/day) |                    |                    | P       | Total marine n-3 (median [min, max] g/day) |                    |                    | P       |
|------------------------------------------------|------------------------------------------------|--------------------|--------------------|---------|--------------------------------------------|--------------------|--------------------|---------|
|                                                | Q:1                                            | Q:3                | Q:5                |         | Q:1                                        | Q:3                | Q:5                |         |
|                                                | 0.07 [0, 0.07]                                 | 0.21 [0.2, 0.21]   | 0.5 [0.43, 0.64]   |         | 0.95 [0.86, 1.02]                          | 1.35 [1.31, 1.39]  | 1.89 [1.77, 2.1]   |         |
| <i>N</i>                                       | 5839                                           | 5465               | 5617               |         | 5248                                       | 4991               | 5123               |         |
| <b>Age (y)</b>                                 | 52.5 [48.6, 59.0]                              | 52.8 [49.0, 58.8]  | 53.2 [49.2, 59.0]  | 0.0025  | 52.1 [48.5, 57.7]                          | 52.7 [48.9, 58.7]  | 54 [49.6, 60]      | <0.0001 |
| <b>White (%)</b>                               | 96.0                                           | 95.8               | 94.0               | <0.0001 | 95.2                                       | 96.0               | 95.1               | <0.0001 |
| <b>BMI (kg/m<sup>2</sup>)</b>                  | 24.7 [22.3, 28.2]                              | 24.6 [22.3, 27.8]  | 25.0 [22.6, 28.3]  | <0.0001 | 24.3 [22.1, 27.9]                          | 24.9 [22.5, 28.2]  | 25.0 [22.6, 28.3]  | <0.0001 |
| <b>Exercise (MET-h/wk)</b>                     | 6.87 [1.97, 17.51]                             | 9.11 [3.03, 20.74] | 11.3 [4.02, 23.55] | <0.0001 | 7.70 [2.30, 19.5]                          | 9.20 [3.10, 20.94] | 9.90 [3.01, 21.50] | <0.0001 |
| <b>Fruits and vegetables (serving/d)</b>       | 4.44 [2.96, 6.30]                              | 5.45 [3.93, 7.34]  | 6.96 [5.08, 9.32]  | <0.0001 | 4.66 [3.14, 6.64]                          | 5.58 [4.01, 7.63]  | 6.06 [4.29, 8.32]  | <0.0001 |
| <b>Nuts (serving/d)</b>                        | 0 [0, 0.13]                                    | 0.07 [0, 0.13]     | 0.07 [0, 0.13]     | <0.0001 | 0 [0, 0.13]                                | 0.07 [0, 0.13]     | 0.07 [0, 0.13]     | <0.0001 |
| <b>Red meat (serving/d)</b>                    | 0.55 [0.27, 0.91]                              | 0.63 [0.34, 0.98]  | 0.56 [0.33, 0.98]  | <0.0001 | 0.63 [0.34, 1.06]                          | 0.63 [0.34, 0.99]  | 0.50 [0.28, 0.85]  | <0.0001 |
| <b>Energy intake (kcal/d)</b>                  | 1471 [1177, 1826]                              | 1686 [1377, 2035]  | 1896 [1557, 2284]  | <0.0001 | 1639 [1324, 2008]                          | 1707 [1368, 2105]  | 1649 [1322, 2017]  | <0.0001 |
| <b>Dietary magnesium (mg)<sup>1</sup></b>      | 314 [273, 366]                                 | 327 [289, 372]     | 352 [314, 399]     | <0.0001 | 323 [279, 374]                             | 329 [291, 377]     | 334 [294, 386]     | <0.0001 |
| <b>trans Fatty acids (g/d)<sup>1</sup></b>     | 2.27 [1.65, 3.09]                              | 2.10 [1.58, 2.82]  | 1.81 [1.33, 2.47]  | <0.0001 | 2.02 [1.48, 2.7]                           | 2.1 [1.56, 2.83]   | 2.08 [1.47, 2.86]  | <0.0001 |
| <b>Saturated fatty acids (g/d)<sup>1</sup></b> | 20.3 [17.1, 23.7]                              | 19.5 [16.7, 22.5]  | 18.0 [15.2, 20.9]  | <0.0001 | 19.6 [16.3, 23.1]                          | 19.4 [16.5, 22.4]  | 19.0 [16.3, 21.9]  | <0.0001 |
| <b>Cereal fiber (g/d)<sup>1</sup></b>          | 4.27 [3.57, 5.12]                              | 4.33 [3.70, 5.11]  | 4.57 [3.91, 5.41]  | <0.0001 | 4.11 [3.44, 4.91]                          | 4.4 [3.74, 5.16]   | 4.62 [3.92, 5.45]  | <0.0001 |
| <b>Parental history of diabetes (%)</b>        | 24.5                                           | 23.9               | 26.3               | 0.01    | 24.3                                       | 24.6               | 26.0               | 0.13    |
| <b>Glycated hemoglobin (%)</b>                 | 4.99 [4.84, 5.18]                              | 4.99 [4.83, 5.17]  | 5.00 [4.83, 5.18]  | 0.13    | 4.99 [4.83, 5.17]                          | 4.99 [4.83, 5.18]  | 5.00 [4.83, 5.17]  | 0.33    |
| <b>Current smoking (%)</b>                     | 12.5                                           | 11.6               | 10.2               | <0.0001 | 14.2                                       | 10.4               | 11.5               | <0.0001 |
| <b>Daily alcohol use (%)</b>                   | 7.1                                            | 11.9               | 12.0               | <0.0001 | 11.8                                       | 10.5               | 9.78               | <0.0001 |
| <b>Postmenopausal (%)</b>                      | 53.6                                           | 53.8               | 54.7               | 0.0019  | 51.5                                       | 53.7               | 57.5               | <0.0001 |
| <b>Hormone Therapy use (%)</b>                 | 43.0                                           | 44.5               | 44.5               | 0.03    | 42.2                                       | 44.3               | 45.8               | <0.001  |
| <b>Hypertension (%)</b>                        | 23.2                                           | 23.6               | 25.8               | 0.01    | 23.2                                       | 23.1               | 26.0               | 0.0015  |

Values shown are medians (25<sup>th</sup> 75<sup>th</sup> percentile) or percentages. MET-h indicates metabolic equivalent task hours. P values were derived from Wilcoxon rank sum test (continuous variables) or chi-squared test (categorical variables).<sup>1</sup>Energy adjusted.

**Table s3- Baseline characteristics of 26034 women according to quintiles (Q) of energy adjusted EPA, DHA and ALA fatty acid intake.**

| Characteristic                          | Eicosapentaenoic acid (EPA) |                      |                      |          | Docosahexaenoic acid (DHA) |                      |                     |          | $\alpha$ -Linolenic acid (ALA) |                      |                      |          |
|-----------------------------------------|-----------------------------|----------------------|----------------------|----------|----------------------------|----------------------|---------------------|----------|--------------------------------|----------------------|----------------------|----------|
|                                         | Q:1                         | Q:3                  | Q:5                  | <i>P</i> | Q:1                        | Q:3                  | Q:5                 | <i>P</i> | Q:1                            | Q:3                  | Q:5                  | <i>P</i> |
| <i>N</i>                                | 5370                        | 3226                 | 4947                 |          | 6351                       | 4860                 | 4797                |          | 5286                           | 5225                 | 5079                 |          |
| <b>Age (y)</b>                          | 52.6 [48.6<br>59.0]         | 52.7 [48.8<br>58.3]  | 53.6 [49.4<br>59.2]  | <.0001   | 52.5 [48.6<br>58.9]        | 52.8 [48.8<br>58.6]  | 53.4 [49.5<br>59.1] | <.0001   | 52.2 [48.6<br>58.0]            | 52.7 [48.9<br>58.7]  | 53.8 [49.4<br>60.1]  | <.0001   |
| <b>White (%)</b>                        | 96.7                        | 96.5                 | 92.1                 | <.0001   | 96.7                       | 96.1                 | 92.2                | <.0001   | 93.7                           | 96.0                 | 96.8                 | <.0001   |
| <b>BMI (kg/m<sup>2</sup>)</b>           | 24.9 [22.3<br>28.3]         | 25.1 [22.6<br>28.3]  | 24.5 [22.3<br>27.5]  | <.0001   | 24.8 [22.3<br>28.3]        | 24.8 [22.5<br>28.3]  | 24.8 [22.5<br>28.2] | 0.57     | 24.3 [22.1<br>27.8]            | 24.9 [22.6<br>28.3]  | 25.0 [22.5<br>28.4]  | <.0001   |
| <b>Exercise (MET-h/wk)</b>              | 7.14 [2.11<br>17.50]        | 8.83 [2.92<br>20.20] | 11.8 [4.25<br>24.39] | <.0001   | 7.00 [2.12<br>17.87]       | 8.70 [2.87<br>20.20] | 11.8 [4.15<br>24.4] | <.0001   | 8.69 [2.63<br>20.94]           | 9.00 [3.01<br>20.61] | 8.68 [2.64<br>20.20] | 0.01     |
| <b>Fruits &amp; veg. (serving/d)</b>    | 4.92 [3.44<br>6.82]         | 5.36 [3.77<br>7.30]  | 6.04 [4.28<br>8.23]  | <.0001   | 4.89[3.33<br>6.87]         | 5.45 [3.89<br>7.50]  | 6.15 [4.34<br>8.43] | <.0001   | 4.87 [3.25<br>6.86]            | 5.65 [4.00<br>7.73]  | 5.81 [4.10<br>7.98]  | <.0001   |
| <b>Nuts (serving/d)</b>                 | 0 [0 0.13]                  | 0 [0 0.13]           | 0.07 [0<br>0.13]     | <.0001   | 0 [0 0.13]                 | 0.07 [0<br>0.13]     | 0.07 [0<br>0.13]    | <.0001   | 0 [0 0.13]                     | 0.07 [0<br>0.13]     | 0.07 [0<br>0.13]     | <.0001   |
| <b>Red meat (serving/d)</b>             | 0.64 [0.34<br>1.06]         | 0.56 [0.34<br>0.91]  | 0.43 [0.27<br>0.77]  | <.0001   | 0.70 [0.34<br>1.07]        | 0.63 [0.35<br>0.99]  | 0.42 [0.27<br>0.71] | <.0001   | 0.56 [0.29<br>0.98]            | 0.63 [0.34<br>0.99]  | 0.56 [0.33<br>0.91]  | <.0001   |
| <b>Energy intake (kcal/d)</b>           | 1604 [1325<br>1988]         | 1545 [1281<br>1954]  | 1577 [1288<br>1947]  | <.0001   | 1655 [1330<br>2050]        | 1681 [1362<br>2074]  | 1592 [1280<br>1961] | <.0001   | 1644 [1329<br>2004]            | 1713 [1368<br>2093]  | 1656 [1334<br>2026]  | <.0001   |
| <b>Diet. magnesium (mg)<sup>1</sup></b> | 314 [274<br>364]            | 331 [294<br>378]     | 351 [312<br>400]     | <.0001   | 312 [272<br>362]           | 327 [291<br>373]     | 357 [316<br>406]    | <.0001   | 332 [285<br>384]               | 331 [291<br>379]     | 323 [286<br>370]     | <.0001   |
| <b>trans FA (g/d)<sup>1</sup></b>       | 2.31 [1.67<br>3.12]         | 2.08 [1.56<br>2.76]  | 1.75 [1.29<br>2.35]  | <.0001   | 2.34 [1.71<br>3.15]        | 2.10 [1.59<br>2.82]  | 1.72 [1.27<br>2.33] | <.0001   | 1.86 [1.37<br>2.55]            | 2.11 [1.58<br>2.79]  | 2.28 [1.62<br>3.08]  | <.0001   |
| <b>Saturated FA (g/d)<sup>1</sup></b>   | 20.4 [17.2<br>23.7]         | 19.3 [16.5<br>22.1]  | 17.9 [15.1<br>20.9]  | <.0001   | 20.5 [17.3<br>23.8]        | 19.5 [16.7<br>22.3]  | 17.7 [14.9<br>20.7] | <.0001   | 18.9 [15.6<br>22.3]            | 19.3 [16.6<br>22.3]  | 19.6 [16.9<br>22.5]  | <.0001   |
| <b>Cereal fibre (g/d)<sup>1</sup></b>   | 4.27 [3.59<br>5.13]         | 4.38 [3.75<br>5.12]  | 4.58 [3.89<br>5.44]  | <.0001   | 4.24 [3.57<br>5.09]        | 4.33 [3.70<br>5.10]  | 4.61 [3.92<br>5.49] | <.0001   | 4.15 [3.47<br>4.99]            | 4.39 [3.73<br>5.16]  | 4.55 [3.86<br>5.38]  | <.0001   |
| <b>Par. Hist. diabetes (%)</b>          | 24.4                        | 26.0                 | 24.8                 | 0.17     | 24.4                       | 24.2                 | 25.8                | 0.32     | 24.4                           | 24.7                 | 25.6                 | 0.38     |

Online Supporting Material

|                              |                     |                     |                     |        |                     |                     |                     |        |                     |                     |                     |        |
|------------------------------|---------------------|---------------------|---------------------|--------|---------------------|---------------------|---------------------|--------|---------------------|---------------------|---------------------|--------|
| <b>GH (%)</b>                | 5.00 [4.84<br>5.18] | 4.99 [4.83<br>5.16] | 4.98 [4.82<br>5.17] | 0.03   | 5.00 [4.84<br>5.17] | 4.99 [4.84<br>5.17] | 4.99 [4.83<br>5.17] | 0.25   | 4.99 [4.83<br>5.17] | 4.98 [4.83<br>5.17] | 5.01 [4.84<br>5.18] | 0.03   |
| <b>Current smoking (%)</b>   | 12.4                | 13.2                | 10.1                | <.0001 | 12.9                | 11.9                | 10.3                | <.0001 | 13.8                | 10.4                | 12.1                | <.0001 |
| <b>Daily alcohol use (%)</b> | 7.32                | 10.3                | 13.7                | <.0001 | 8.36                | 10.3                | 11.5                | <.0001 | 13.5                | 9.90                | 9.18                | <.0001 |
| <b>Postmenopausal (%)</b>    | 53.7                | 52.6                | 55.8                | <.0001 | 53.5                | 54.3                | 55.4                | <.0001 | 51.6                | 54.1                | 57.6                | <.0001 |
| <b>HT use (%)</b>            | 42.4                | 45.2                | 46.8                | <.0001 | 42.4                | 43.6                | 46.0                | <.001  | 41.7                | 44.4                | 45.5                | 0.0018 |
| <b>Hypertension (%)</b>      | 22.9                | 24.0                | 24.4                | 0.22   | 23.3                | 23.7                | 25.8                | 0.02   | 23.6                | 23.6                | 25.4                | 0.14   |

Values shown are medians (25<sup>th</sup> 75<sup>th</sup> percentile) or percentages. MET-h indicates metabolic equivalent task hours. veg.: vegetables. Diet. Magnesium: Dietary magnesium. FA: Fatty Acids. Par. Hist. Diabetes: Parental History of Diabetes. GH: Glycated Haemoglobin. P values were derived from Wilcoxon rank sum test (continuous variables) or chi-squared test (categorical variables). <sup>1</sup>Energy adjusted

**Table s4- LDL related variables. Strategy based on modelling energy adjusted variables.**

|                           |                        | Quintile of energy adjusted EPA intake (gm) |                     |                     | P <sub>Trend</sub> |
|---------------------------|------------------------|---------------------------------------------|---------------------|---------------------|--------------------|
|                           |                        | Q1                                          | Q3                  | Q5                  |                    |
|                           |                        | 0.01 [0.01 0.01]                            | 0.04 [0.04 0.05]    | 0.12 [0.11 0.16]    |                    |
| <b>LDL-C</b><br>(mg/dL)   | Raw mean               | 123 ± 34                                    | 125 ± 34            | 124 ± 35            |                    |
|                           | Adj. mean <sup>1</sup> | 123 [122 124]                               | 125 [124 126]       | 124 [123 125]       | 0.29               |
|                           | Adj. mean <sup>2</sup> | 123 [122 125]                               | 124 [123 125]       | 123 [122 125]       | 0.50               |
| <b>TC</b><br>(mg/dL)      | Raw mean               | 210 ± 41                                    | 213 ± 42            | 213 ± 42            |                    |
|                           | Adj. mean <sup>1</sup> | 210 [208 211]                               | 213 [212 214]       | 213 [212 214]       | 0.002              |
|                           | Adj. mean <sup>2</sup> | 211 [210 212]                               | 211 [210 212]       | 211 [209 212]       | 0.39               |
| <b>ApoB100</b><br>(mg/dL) | Raw mean               | 103 ± 28                                    | 104 ± 28            | 103 ± 28            |                    |
|                           | Adj. mean <sup>1</sup> | 103 [102 103]                               | 105 [104 105]       | 103 [103 104]       | 0.68               |
|                           | Adj. mean <sup>2</sup> | 103 [102 104]                               | 103 [102 104]       | 103 [101 103.7]     | 0.52               |
| <b>LDL Size</b><br>(Ø nm) | Geom. mean             | 21.04 [21.02 21.06]                         | 21.05 [21.03 21.07] | 21.12 [21.11 21.14] |                    |
|                           | Adj. mean <sup>1</sup> | 21.04 [21.02 21.06]                         | 21.05 [21.03 21.07] | 21.12 [21.1 21.13]  | <.0001             |
|                           | Adj. mean <sup>2</sup> | 21.1 [21.08 21.13]                          | 21.06 [21.03 21.08] | 21.07 [21.04 21.1]  | 0.52               |
| <b>LDL Particles</b>      |                        |                                             |                     |                     |                    |
| <b>Total</b><br>(nm/L)    | Geom. mean             | 1189 [1179 1200]                            | 1211 [1198 1225]    | 1190 [1180 1201]    |                    |
|                           | Adj. mean <sup>1</sup> | 1189 [1178 1199]                            | 1214 [1200 1227]    | 1191 [1180 1202]    | 0.41               |
|                           | Adj. mean <sup>2</sup> | 1184 [1169 1199]                            | 1197 [1183 1210]    | 1182 [1165 1199]    | 0.30               |
| <b>IDL</b><br>(nm/L)      | Geom. mean             | 146 [143 148]                               | 145 [141 148]       | 147 [145 150]       |                    |
|                           | Adj. mean <sup>1</sup> | 146 [143 148]                               | 145 [142 149]       | 146 [143 149]       | 0.96               |
|                           | Adj. mean <sup>2</sup> | 146 [142 151]                               | 145 [141 149]       | 144 [139 149]       | 0.68               |
| <b>Large</b><br>(nm/L)    | Geom. mean             | 463 [454 473]                               | 481 [469 494]       | 515 [505 525]       |                    |
|                           | Adj. mean <sup>1</sup> | 462 [453 471]                               | 482 [470 494]       | 512 [501 523]       | <.0001             |
|                           | Adj. mean <sup>2</sup> | 491 [475 507]                               | 480 [467 494]       | 488 [470 506]       | 0.89               |
| <b>Small A</b><br>(nm/L)  | Geom. mean             | 62.2 [61.3 63.2]                            | 64 [62.6 65.5]      | 65.8 [64.4 67.2]    |                    |
|                           | Adj. mean <sup>1</sup> | 62.3 [61.3 63.2]                            | 64 [62.6 65.4]      | 66 [64.5 67.4]      | <.001              |
|                           | Adj. mean <sup>2</sup> | 62.4 [60.7 64.2]                            | 63.9 [62.3 65.6]    | 65.7 [63.2 68.2]    | 0.16               |
| <b>Small B</b><br>(nm/L)  | Geom. mean             | 661 [650 671]                               | 662 [648 676]       | 647 [635 658]       |                    |
|                           | Adj. mean <sup>1</sup> | 662 [651 673]                               | 663 [649 676]       | 644 [632 656]       | 0.02               |
|                           | Adj. mean <sup>2</sup> | 657 [640 673]                               | 654 [640 669]       | 637 [619 656]       | 0.27               |

Raw means ± sd and geometric (Geom.) means [CI]. <sup>1</sup> Model 1: The adjusted means (Adj.) are estimated from linear regression models adjusted for age (continuous), total energy (quintiles), energy adjusted saturated fats (quintiles), energy adjusted monounsaturated fats (quintiles), energy adjusted *trans*-fat (quintiles), energy adjusted total n-6 (quintiles) and energy adjusted proteins (quintiles). \*Is-means.

<sup>2</sup> Model 2: Adjusted as in model 1 but including smoking (current, past, never), alcohol use (rarely/never, 1–3 drinks/month, 1–6 drinks/week, and 1 drinks/day), BMI (continuous), exercise (quintiles of metabolic equivalent task hours per week), menopausal status (premenopausal, uncertain, postmenopausal), use of HT (current, past/never), hypertension (systolic blood pressure of at least 140 mmHg, diastolic blood pressure of at least 90 mmHg), antihypertensive treatment (yes or no), hypercholesterolemia (total cholesterol of at least 240 mg/dL), treatment for high cholesterol (yes or no), parental history of CHD (yes or no), energy adjusted glycemic index (quintiles), multivitamin use (current, past and never), aspirin use (Current use > 1x/week), red meat consumption, fruits and vegetables consumption (both quintiles) and energy adjusted ALA and DHA fatty acids (both in quintiles).

**Table s5- LDL related variables. Strategy based on modelling energy adjusted variables.**

|                      |                        | Quintile of energy adjusted DHA intake (gm) |                     |                     |                    |
|----------------------|------------------------|---------------------------------------------|---------------------|---------------------|--------------------|
|                      |                        | Q2                                          | Q3                  | Q5                  | P <sub>Trend</sub> |
|                      |                        | 0.09 [0.08 0.1]                             | 0.12 [0.11 0.13]    | 0.28 [0.24 0.35]    |                    |
| <b>LDL-C</b>         | Raw mean               | 124 ± 33                                    | 125 ± 35            | 125 ± 35            |                    |
| <b>(mg/dL)</b>       | Adj. mean <sup>1</sup> | 124 [123 125]                               | 125 [124 126]       | 125 [124 126]       | 0.005              |
|                      | Adj. mean <sup>2</sup> | 123 [122 124]                               | 124 [123 125]       | 124 [123 126]       | 0.23               |
| <b>TC</b>            | Raw mean               | 212 ± 41                                    | 212 ± 42            | 214 ± 42            |                    |
| <b>(mg/dL)</b>       | Adj. mean <sup>1</sup> | 212 [210 213]                               | 213 [211 214]       | 214 [213 215]       | <.0001             |
|                      | Adj. mean <sup>2</sup> | 211 [210 212]                               | 212 [211 213]       | 212 [211 214]       | 0.11               |
| <b>ApoB100</b>       | Raw mean               | 104 ± 28                                    | 104 ± 28            | 104 ± 28            |                    |
| <b>(mg/dL)</b>       | Adj. mean <sup>1</sup> | 104 [103 104]                               | 104 [103 104]       | 104 [103 105]       | 0.01               |
|                      | Adj. mean <sup>2</sup> | 103 [102 104]                               | 103 [102 103]       | 104 [102 104.8]     | 0.27               |
| <b>LDL Size</b>      | Geom. mean             | 21.06 [21.04 21.08]                         | 21.08 [21.06 21.1]  | 21.11 [21.09 21.13] |                    |
| <b>(Ø nm)</b>        | Adj. mean <sup>1</sup> | 21.06 [21.04 21.08]                         | 21.08 [21.06 21.1]  | 21.11 [21.09 21.13] | <.0001             |
|                      | Adj. mean <sup>2</sup> | 21.07 [21.04 21.09]                         | 21.09 [21.07 21.11] | 21.12 [21.08 21.15] | 0.0075             |
| <b>LDL Particles</b> |                        |                                             |                     |                     |                    |
| <b>Total</b>         | Geom. mean             | 1198 [1187 1210]                            | 1201 [1190 1212]    | 1203 [1192 1214]    |                    |
| <b>(nm/L)</b>        | Adj. mean <sup>1</sup> | 1197 [1186 1208]                            | 1201 [1190 1211]    | 1204 [1192 1216]    | 0.09               |
|                      | Adj. mean <sup>2</sup> | 1186 [1173 1199]                            | 1187 [1176 1198]    | 1198 [1180 1217]    | 0.38               |
| <b>IDL</b>           | Geom. mean             | 147 [144 150]                               | 146 [144 149]       | 147 [144 150]       |                    |
| <b>(nm/L)</b>        | Adj. mean <sup>1</sup> | 147 [144 150]                               | 147 [144 150]       | 146 [143 149]       | 0.85               |
|                      | Adj. mean <sup>2</sup> | 146 [142 150]                               | 145 [142 149]       | 146 [141 152]       | 0.83               |
| <b>Large</b>         | Geom. mean             | 476 [466 487]                               | 489 [479 499]       | 507 [496 518]       |                    |
| <b>(nm/L)</b>        | Adj. mean <sup>1</sup> | 477 [467 487]                               | 490 [480 500]       | 508 [497 519]       | <.0001             |
|                      | Adj. mean <sup>2</sup> | 479 [465 492]                               | 493 [482 505]       | 504 [485 524]       | 0.02               |
| <b>Small A</b>       | Geom. mean             | 63.7 [62.5 64.9]                            | 63.3 [61.9 64.7]    | 65.3 [63.9 66.7]    |                    |
| <b>(nm/L)</b>        | Adj. mean <sup>1</sup> | 63.5 [62.3 64.8]                            | 63.2 [61.9 64.6]    | 65.4 [63.9 66.9]    | 0.005              |
|                      | Adj. mean <sup>2</sup> | 64.2 [62.6 66]                              | 62.9 [61.4 64.5]    | 63.3 [60.9 65.9]    | 0.72               |
| <b>Small B</b>       | Geom. mean             | 655 [644 667]                               | 651 [640 663]       | 658 [647 670]       |                    |
| <b>(nm/L)</b>        | Adj. mean <sup>1</sup> | 657 [645 668]                               | 651 [641 663]       | 655 [643 667]       | 0.23               |
|                      | Adj. mean <sup>2</sup> | 650 [636 664]                               | 648 [636 660]       | 654 [635 674]       | 0.96               |

Raw means ± sd and geometric (Geom.) means [CI]. <sup>1</sup> Model 1: The adjusted means (Adj.) are estimated from linear regression models adjusted for age (continuous), total energy (quintiles), energy adjusted saturated fats (quintiles), energy adjusted monounsaturated fats (quintiles), energy adjusted *trans* fat (quintiles), energy adjusted total n-6 (quintiles) and energy adjusted proteins (quintiles).

<sup>2</sup> Model 2: Adjusted as in model 1 but including smoking (current, past, never), alcohol use (rarely/never, 1–3 drinks/month, 1–6 drinks/week, and 1 drinks/day), BMI (continuous), exercise (quintiles of metabolic equivalent task hours per week), menopausal status (premenopausal, uncertain, postmenopausal), use of HT (current, past/never), hypertension (systolic blood pressure of at least 140 mmHg, diastolic blood pressure of at least 90 mmHg), antihypertensive treatment (yes or no), hypercholesterolemia (total cholesterol of at least 240 mg/dL), treatment for high cholesterol (yes or no), parental history of CHD (yes or no), energy adjusted glycemic index (quintiles), multivitamin use (current, past and never), aspirin use (Current use > 1x/week), red meat consumption, fruits and vegetables consumption (both quintiles) and energy adjusted ALA and EPA fatty acids (both in quintiles).



**Table s6- LDL related variables. Strategy based on modelling energy adjusted variables.**

|                      |                        | Quintile of energy adjusted ALA intake (gm) |                     |                     |                    |
|----------------------|------------------------|---------------------------------------------|---------------------|---------------------|--------------------|
|                      |                        | Q1                                          | Q3                  | Q5                  | P <sub>Trend</sub> |
|                      |                        | 0.79 [0.71 0.84]                            | 1.12 [1.08 1.16]    | 1.61 [1.5 1.79]     |                    |
| <b>LDL-C</b>         | Raw mean               | 123 ± 34                                    | 124 ± 35            | 125 ± 34            |                    |
| <b>(mg/dL)</b>       | Adj. mean <sup>1</sup> | 125 [124 126]                               | 124 [123 125]       | 124 [122 125]       | 0.10               |
|                      | Adj. mean <sup>2</sup> | 125 [124 126]                               | 123 [123 124]       | 123 [122 124]       | 0.03               |
| <b>TC</b>            | Raw mean               | 211 ± 42                                    | 212 ± 42            | 213 ± 42            |                    |
| <b>(mg/dL)</b>       | Adj. mean <sup>1</sup> | 213 [211 214]                               | 212 [211 213]       | 211 [210 213]       | 0.38               |
|                      | Adj. mean <sup>2</sup> | 212 [211 213]                               | 211 [210 212]       | 211 [210 212]       | 0.25               |
| <b>ApoB100</b>       | Raw mean               | 103 ± 28                                    | 104 ± 28            | 104 ± 28            |                    |
| <b>(mg/dL)</b>       | Adj. mean <sup>1</sup> | 104 [103 105]                               | 104 [103 104]       | 103 [102 104]       | 0.19               |
|                      | Adj. mean <sup>2</sup> | 104 [103 105]                               | 103 [102 104]       | 103 [102 103.4]     | 0.09               |
| <b>LDL Size</b>      | Geom. mean             | 21.08 [21.06 21.1]                          | 21.07 [21.06 21.09] | 21.05 [21.04 21.07] |                    |
| <b>(Ø nm)</b>        | Adj. mean <sup>1</sup> | 21.04 [21.02 21.07]                         | 21.08 [21.06 21.1]  | 21.08 [21.06 21.11] | 0.03               |
|                      | Adj. mean <sup>2</sup> | 21.05 [21.03 21.07]                         | 21.08 [21.07 21.1]  | 21.1 [21.07 21.12]  | 0.002              |
| <b>LDL Particles</b> |                        |                                             |                     |                     |                    |
| <b>Total</b>         | Geom. mean             | 1189 [1178 1199]                            | 1200 [1189 1211]    | 1212 [1202 1223]    |                    |
| <b>(nm/L)</b>        | Adj. mean <sup>1</sup> | 1208 [1196 1221]                            | 1199 [1188 1209]    | 1195 [1181 1208]    | 0.23               |
|                      | Adj. mean <sup>2</sup> | 1203 [1191 1215]                            | 1189 [1180 1199]    | 1186 [1173 1199]    | 0.12               |
| <b>IDL</b>           | Geom. mean             | 152 [149 155]                               | 146 [144 149]       | 141 [138 144]       |                    |
| <b>(nm/L)</b>        | Adj. mean <sup>1</sup> | 147 [144 151]                               | 146 [144 149]       | 146 [142 149]       | 0.80               |
|                      | Adj. mean <sup>2</sup> | 146 [143 150]                               | 145 [143 148]       | 145 [142 149]       | 0.95               |
| <b>Large</b>         | Geom. mean             | 474 [464 484]                               | 490 [480 500]       | 493 [483 503]       |                    |
| <b>(nm/L)</b>        | Adj. mean <sup>1</sup> | 472 [460 484]                               | 492 [482 503]       | 489 [477 502]       | 0.09               |
|                      | Adj. mean <sup>2</sup> | 476 [463 489]                               | 493 [482 503]       | 491 [477 505]       | 0.15               |
| <b>Small A</b>       | Geom. mean             | 60.7 [59.4 62.1]                            | 64.1 [62.9 65.4]    | 65.8 [64.4 67.1]    |                    |
| <b>(nm/L)</b>        | Adj. mean <sup>1</sup> | 63.1 [61.6 64.7]                            | 64 [62.7 65.3]      | 63.4 [61.7 65.1]    | 0.84               |
|                      | Adj. mean <sup>2</sup> | 62.5 [60.8 64.2]                            | 63.8 [62.4 65.1]    | 63.2 [61.5 65.1]    | 0.98               |
| <b>Small B</b>       | Geom. mean             | 654 [643 665]                               | 652 [641 663]       | 669 [658 681]       |                    |
| <b>(nm/L)</b>        | Adj. mean <sup>1</sup> | 663 [650 677]                               | 652 [641 663]       | 659 [645 673]       | 0.78               |
|                      | Adj. mean <sup>2</sup> | 661 [648 675]                               | 648 [637 659]       | 655 [641 669]       | 0.80               |

Raw means ± sd and geometric (Geom.) means [CI]. <sup>1</sup> Model 1: The adjusted means (Adj.) are estimated from linear regression models adjusted for age (continuous), total energy (quintiles), energy adjusted saturated fats (quintiles), energy adjusted monounsaturated fats (quintiles), energy adjusted *trans* fat (quintiles), energy adjusted total n-6 (quintiles) and energy adjusted proteins (quintiles).

<sup>2</sup> Model 2: Adjusted as in model 1 but including smoking (current, past, never), alcohol use (rarely/never, 1–3 drinks/month, 1–6 drinks/week, and 1 drinks/day), BMI (continuous), exercise (quintiles of metabolic equivalent task hours per week), menopausal status (premenopausal, uncertain, postmenopausal), use of HT (current, past/never), hypertension (systolic blood pressure of at least 140 mmHg, diastolic blood pressure of at least 90 mmHg), antihypertensive treatment (yes or no), hypercholesterolemia (total cholesterol of at least 240 mg/dL), treatment for high cholesterol (yes or no), parental history of CHD (yes or no), energy adjusted glycemic index (quintiles), multivitamin use (current, past and never), aspirin use (Current use > 1x/week), red meat consumption, fruits and vegetables consumption (both quintiles) and energy adjusted EPA and DHA fatty acids (both in quintiles).

**Table s7- VLDL related variables. Strategy based on modelling energy adjusted variables.**

|                                   |                        | Quintile of energy adjusted EPA intake (gm) |                     |                     |                    |
|-----------------------------------|------------------------|---------------------------------------------|---------------------|---------------------|--------------------|
|                                   |                        | Q1                                          | Q3                  | Q5                  | P <sub>Trend</sub> |
|                                   |                        | 0.01 [0.01 0.01]                            | 0.04 [0.04 0.05]    | 0.12 [0.11 0.16]    |                    |
| <b>TG</b><br><b>(mg/dL)</b>       | Geom. mean             | 124 [122 125]                               | 124 [122 127]       | 117 [115 119]       |                    |
|                                   | Adj. mean <sup>1</sup> | 124 [122 126]                               | 125 [122 127]       | 117 [115 119]       | <.0001             |
|                                   | Adj. mean <sup>2</sup> | 121 [118 124]                               | 123 [120 125]       | 118 [115 121]       | 0.19               |
| <b>VLDL Size</b><br><b>(Ø nm)</b> | Geom. mean             | 51.11 [50.92 51.31]                         | 51.05 [50.81 51.3]  | 50.87 [50.68 51.07] |                    |
|                                   | Adj. mean <sup>1</sup> | 51.12 [50.93 51.31]                         | 51.1 [50.86 51.35]  | 50.87 [50.67 51.07] | 0.07               |
|                                   | Adj. mean <sup>2</sup> | 50.93 [50.62 51.24]                         | 51.06 [50.79 51.32] | 50.91 [50.58 51.25] | 0.87               |
| <b>VLDL Particles</b>             |                        |                                             |                     |                     |                    |
| <b>Total</b><br><b>(nm/L)</b>     | Geom. mean             | 57.3 [56.7 58]                              | 56.7 [55.8 57.7]    | 53.1 [52.4 53.8]    |                    |
|                                   | Adj. mean <sup>1</sup> | 57.3 [56.6 58]                              | 56.6 [55.8 57.5]    | 53.4 [52.7 54.1]    | <.0001             |
|                                   | Adj. mean <sup>2</sup> | 55.9 [54.8 57.1]                            | 56.4 [55.4 57.4]    | 54.1 [53 55.4]      | 0.03               |
| <b>Large</b><br><b>(nm/L)</b>     | Geom. mean             | 2.62 [2.54 2.69]                            | 2.53 [2.45 2.63]    | 2.21 [2.14 2.28]    |                    |
|                                   | Adj. mean <sup>1</sup> | 2.61 [2.54 2.69]                            | 2.56 [2.47 2.66]    | 2.23 [2.16 2.29]    | <.0001             |
|                                   | Adj. mean <sup>2</sup> | 2.46 [2.35 2.58]                            | 2.51 [2.41 2.6]     | 2.3 [2.19 2.41]     | 0.07               |
| <b>Medium</b><br><b>(nm/L)</b>    | Geom. mean             | 13.4 [13.1 13.7]                            | 13.2 [12.9 13.6]    | 12.2 [11.9 12.5]    |                    |
|                                   | Adj. mean <sup>1</sup> | 13.5 [13.2 13.8]                            | 13.2 [12.9 13.6]    | 12.1 [11.8 12.4]    | <.0001             |
|                                   | Adj. mean <sup>2</sup> | 12.7 [12.3 13.2]                            | 13.1 [12.6 13.5]    | 12.5 [12 13.1]      | 0.26               |
| <b>Small</b><br><b>(nm/L)</b>     | Geom. mean             | 36.8 [36.2 37.3]                            | 36.4 [35.7 37.1]    | 34.2 [33.6 34.8]    |                    |
|                                   | Adj. mean <sup>1</sup> | 36.5 [36 37.1]                              | 36.3 [35.6 36.9]    | 34.6 [34 35.1]      | <.0001             |
|                                   | Adj. mean <sup>2</sup> | 36.1 [35.2 37]                              | 36.2 [35.5 37]      | 34.8 [33.8 35.7]    | 0.07               |
| <b>VLDL-TG</b><br><b>(mg/dL)</b>  | Geom. mean             | 76.5 [75.5 77.6]                            | 75.6 [74.3 76.9]    | 70.3 [69.3 71.3]    |                    |
|                                   | Adj. mean <sup>1</sup> | 76.6 [75.6 77.6]                            | 75.7 [74.4 77]      | 70.6 [69.6 71.6]    | <.0001             |
|                                   | Adj. mean <sup>2</sup> | 74.2 [72.7 75.9]                            | 75 [73.7 76.4]      | 71.6 [70 73.3]      | 0.02               |

Raw means  $\pm$  sd and geometric (Geom.) means [CI]. <sup>1</sup> Model 1: The adjusted means (Adj.) are estimated from linear regression models adjusted for age (continuous), total energy (quintiles), energy adjusted saturated fats (quintiles), energy adjusted monounsaturated fats (quintiles), energy adjusted *trans*-fat (quintiles), energy adjusted total n-6 (quintiles) and energy adjusted proteins (quintiles).

<sup>2</sup> Model 2: Adjusted as in model 1 but including smoking (current, past, never), alcohol use (rarely/never, 1–3 drinks/month, 1–6 drinks/week, and 1 drinks/day), BMI (continuous), exercise (quintiles of metabolic equivalent task hours per week), menopausal status (premenopausal, uncertain, postmenopausal), use of HT (current, past/never), hypertension (systolic blood pressure of at least 140 mmHg, diastolic blood pressure of at least 90 mmHg), antihypertensive treatment (yes or no), hypercholesterolemia (total cholesterol of at least 240 mg/dL), treatment for high cholesterol (yes or no), parental history of CHD (yes or no), energy adjusted glycemic index (quintiles), multivitamin use (current, past and never), aspirin use (Current use > 1x/week), red meat consumption, fruits and vegetables consumption (both quintiles) and energy adjusted ALA and DHA fatty acids (both in quintiles).

**Table s8- VLDL related variables. Strategy based on modelling energy adjusted variables.**

|                                             |                        | Quintile of energy adjusted DHA intake (gm) |                     |                     |                    |
|---------------------------------------------|------------------------|---------------------------------------------|---------------------|---------------------|--------------------|
|                                             |                        | Q1                                          | Q3                  | Q5                  | P <sup>Trend</sup> |
|                                             |                        | 0.05 [0.03 0.06]                            | 0.12 [0.11 0.13]    | 0.28 [0.24 0.35]    |                    |
| <b>TG</b><br><b>(mg/dL)</b>                 | Geom. mean             | 123 [121 125]                               | 121 [119 123]       | 119 [117 121]       |                    |
|                                             | Adj. mean <sup>1</sup> | 123 [122 125]                               | 121 [119 123]       | 118 [117 120]       | <.0001             |
|                                             | Adj. mean <sup>2</sup> | 122 [119 125]                               | 119 [117 121]       | 119 [116 122]       | 0.35               |
| <b>VLDL</b><br><b>Size</b><br><b>(Ø nm)</b> | Geom. mean             | 51.18 [51 51.36]                            | 50.77 [50.58 50.97] | 50.92 [50.72 51.12] |                    |
|                                             | Adj. mean <sup>1</sup> | 51.17 [50.99 51.36]                         | 50.78 [50.59 50.98] | 50.91 [50.7 51.12]  | 0.30               |
|                                             | Adj. mean <sup>2</sup> | 51.22 [50.92 51.53]                         | 50.77 [50.56 50.99] | 50.83 [50.47 51.19] | 0.39               |
| <b>VLDL Particles</b>                       |                        |                                             |                     |                     |                    |
| <b>Total</b><br><b>(nm/L)</b>               | Geom. mean             | 57.2 [56.5 57.8]                            | 56.3 [55.6 57.1]    | 53.9 [53.1 54.6]    |                    |
|                                             | Adj. mean <sup>1</sup> | 57.2 [56.5 57.9]                            | 56.2 [55.5 56.9]    | 54 [53.2 54.7]      | <.0001             |
|                                             | Adj. mean <sup>2</sup> | 56.3 [55.2 57.4]                            | 55.3 [54.5 56.1]    | 55.4 [54.1 56.8]    | 0.61               |
| <b>Large</b><br><b>(nm/L)</b>               | Geom. mean             | 2.63 [2.57 2.7]                             | 2.43 [2.36 2.5]     | 2.27 [2.2 2.34]     |                    |
|                                             | Adj. mean <sup>1</sup> | 2.63 [2.56 2.7]                             | 2.43 [2.36 2.5]     | 2.28 [2.21 2.35]    | <.0001             |
|                                             | Adj. mean <sup>2</sup> | 2.58 [2.47 2.7]                             | 2.36 [2.29 2.44]    | 2.35 [2.23 2.48]    | 0.12               |
| <b>Medium</b><br><b>(nm/L)</b>              | Geom. mean             | 13.4 [13.2 13.7]                            | 13.2 [12.9 13.5]    | 12.3 [12 12.7]      |                    |
|                                             | Adj. mean <sup>1</sup> | 13.6 [13.3 13.9]                            | 13.2 [12.8 13.5]    | 12.2 [11.9 12.5]    | <.0001             |
|                                             | Adj. mean <sup>2</sup> | 13.5 [13 14]                                | 12.7 [12.4 13.1]    | 12.5 [12 13.1]      | 0.10               |
| <b>Small</b><br><b>(nm/L)</b>               | Geom. mean             | 36.5 [36 37]                                | 36.1 [36.5 36.7]    | 34.6 [34.1 35.2]    |                    |
|                                             | Adj. mean <sup>1</sup> | 36.4 [35.8 36.9]                            | 36 [35.5 36.6]      | 34.9 [34.4 35.5]    | <.001              |
|                                             | Adj. mean <sup>2</sup> | 35.7 [34.8 36.6]                            | 35.6 [35 36.2]      | 36 [34.9 37]        | 0.70               |
| <b>VLDL-</b><br><b>TG</b><br><b>(mg/dL)</b> | Geom. mean             | 76.5 [75.6 77.4]                            | 74.2 [73.2 75.2]    | 71.4 [70.4 72.5]    |                    |
|                                             | Adj. mean <sup>1</sup> | 76.7 [75.7 77.7]                            | 74.1 [73.1 75.1]    | 71.4 [70.3 72.5]    | <.0001             |
|                                             | Adj. mean <sup>2</sup> | 75.5 [73.9 77.1]                            | 72.7 [71.6 73.8]    | 73.1 [71.3 75]      | 0.30               |

Raw means ± sd and geometric (Geom.) means [CI]. <sup>1</sup> Model 1: The adjusted means (Adj.) are estimated from linear regression models adjusted for age (continuous), total energy (quintiles), energy adjusted saturated fats (quintiles), energy adjusted monounsaturated fats (quintiles), energy adjusted *trans* fat (quintiles), energy adjusted total n-6 (quintiles) and energy adjusted proteins (quintiles).

<sup>2</sup> Model 2: Adjusted as in model 1 but including smoking (current, past, never), alcohol use (rarely/never, 1–3 drinks/month, 1–6 drinks/week, and 1 drinks/day), BMI (continuous), exercise (quintiles of metabolic equivalent task hours per week), menopausal status (premenopausal, uncertain, postmenopausal), use of HT (current, past/never), hypertension (systolic blood pressure of at least 140 mmHg, diastolic blood pressure of at least 90 mmHg), antihypertensive treatment (yes or no), hypercholesterolemia (total cholesterol of at least 240 mg/dL), treatment for high cholesterol (yes or no), parental history of CHD (yes or no), energy adjusted glycemic index (quintiles), multivitamin use (current, past and never), aspirin use (Current use > 1x/week), red meat consumption, fruits and vegetables consumption (both quintiles) and energy adjusted ALA and EPA fatty acids (both in quintiles).

**Table s9- VLDL related variables. Strategy based on modelling energy adjusted variables.**

|                                   |                        | Quintile of energy adjusted ALA intake (gm) |                     |                     | P <sub>Trend</sub> |
|-----------------------------------|------------------------|---------------------------------------------|---------------------|---------------------|--------------------|
|                                   |                        | Q1                                          | Q3                  | Q5                  |                    |
|                                   |                        | 0.79 [0.71 0.84]                            | 1.12 [1.08 1.16]    | 1.61 [1.5 1.79]     |                    |
| <b>TG</b><br><b>(mg/dL)</b>       | Geom. mean             | 122 [120 123]                               | 122 [121 124]       | 122 [121 124]       |                    |
|                                   | Adj. mean <sup>1</sup> | 123 [121 125]                               | 122 [120 124]       | 122 [119 124]       | 0.62               |
|                                   | Adj. mean <sup>2</sup> | 122 [120 124]                               | 121 [119 123]       | 121 [118 123]       | 0.64               |
| <b>VLDL Size</b><br><b>(Ø nm)</b> | Geom. mean             | 51.53 [51.34 51.74]                         | 51 [50.81 51.19]    | 50.61 [50.42 50.8]  |                    |
|                                   | Adj. mean <sup>1</sup> | 51.26 [51.03 51.5]                          | 51.03 [50.83 51.22] | 50.84 [50.59 51.09] | 0.04               |
|                                   | Adj. mean <sup>2</sup> | 51.25 [51 51.5]                             | 50.98 [50.78 51.17] | 50.72 [50.46 50.97] | 0.01               |
| <b>VLDL Particles</b>             |                        |                                             |                     |                     |                    |
| <b>Total</b><br><b>(nm/L)</b>     | Geom. mean             | 54.2 [53.5 54.9]                            | 56.6 [55.9 57.3]    | 57.6 [56.9 58.3]    |                    |
|                                   | Adj. mean <sup>1</sup> | 56.3 [55.4 57.2]                            | 56.4 [55.7 57.1]    | 55.7 [54.8 56.6]    | 0.45               |
|                                   | Adj. mean <sup>2</sup> | 55.7 [54.8 56.7]                            | 56.2 [55.5 56.9]    | 55.8 [54.8 56.7]    | 0.94               |
| <b>Large</b><br><b>(nm/L)</b>     | Geom. mean             | 2.63 [2.56 2.7]                             | 2.5 [2.42 2.57]     | 2.36 [2.29 2.43]    |                    |
|                                   | Adj. mean <sup>1</sup> | 2.59 [2.5 2.68]                             | 2.49 [2.41 2.56]    | 2.43 [2.34 2.52]    | 0.06               |
|                                   | Adj. mean <sup>2</sup> | 2.56 [2.47 2.66]                            | 2.45 [2.38 2.52]    | 2.38 [2.29 2.47]    | 0.04               |
| <b>Medium</b><br><b>(nm/L)</b>    | Geom. mean             | 12.9 [12.6 13.1]                            | 13.3 [13 13.7]      | 13.1 [12.8 13.5]    |                    |
|                                   | Adj. mean <sup>1</sup> | 13.2 [12.8 13.6]                            | 13.3 [12.9 13.6]    | 13 [12.6 13.4]      | 0.65               |
|                                   | Adj. mean <sup>2</sup> | 13 [12.6 13.4]                              | 13.1 [12.8 13.4]    | 12.9 [12.5 13.3]    | 0.88               |
| <b>Small</b><br><b>(nm/L)</b>     | Geom. mean             | 34.1 [33.5 34.7]                            | 36.3 [35.7 36.8]    | 37.3 [36.8 37.9]    |                    |
|                                   | Adj. mean <sup>1</sup> | 35.7 [35 36.4]                              | 36.2 [35.6 36.7]    | 35.8 [35.1 36.5]    | 0.96               |
|                                   | Adj. mean <sup>2</sup> | 35.4 [34.7 36.2]                            | 36.1 [35.5 36.7]    | 35.9 [35.2 36.7]    | 0.61               |
| <b>VLDL-TG</b><br><b>(mg/dL)</b>  | Geom. mean             | 74.1 [73.1 75.1]                            | 75.3 [74.3 76.3]    | 74.9 [73.9 76]      |                    |
|                                   | Adj. mean <sup>1</sup> | 75.6 [74.4 76.9]                            | 75.1 [74.1 76.1]    | 73.8 [72.5 75.1]    | 0.11               |
|                                   | Adj. mean <sup>2</sup> | 74.8 [73.5 76.1]                            | 74.6 [73.5 75.6]    | 73.4 [72.1 74.7]    | 0.23               |

Raw means ± sd and geometric (Geom.) means [CI]. <sup>1</sup> Model 1: The adjusted means (Adj.) are estimated from linear regression models adjusted for age (continuous), total energy (quintiles), energy adjusted saturated fats (quintiles), energy adjusted monounsaturated fats (quintiles), energy adjusted *trans* fat (quintiles), energy adjusted total n-6 (quintiles) and energy adjusted proteins (quintiles).

<sup>2</sup> Model 2: Adjusted as in model 1 but including smoking (current, past, never), alcohol use (rarely/never, 1–3 drinks/month, 1–6 drinks/week, and 1 drinks/day), BMI (continuous), exercise (quintiles of metabolic equivalent task hours per week), menopausal status (premenopausal, uncertain, postmenopausal), use of HT (current, past/never), hypertension (systolic blood pressure of at least 140 mmHg, diastolic blood pressure of at least 90 mmHg), antihypertensive treatment (yes or no), hypercholesterolemia (total cholesterol of at least 240 mg/dL), treatment for high cholesterol (yes or no), parental history of CHD (yes or no), energy adjusted glycemic index (quintiles), multivitamin use (current, past and never), aspirin use (Current use > 1x/week), red meat consumption, fruits and vegetables consumption (both quintiles) and energy adjusted EPA and DHA fatty acids (both in quintiles).

**Table s10- HDL related variables. Strategy based on modelling energy adjusted variables.**

|                      |                        | Quintile of energy adjusted EPA intake (gm) |                  |                  | P <sub>Trend</sub> |
|----------------------|------------------------|---------------------------------------------|------------------|------------------|--------------------|
|                      |                        | Q1                                          | Q3               | Q5               |                    |
|                      |                        | 0.01 [0.01 0.01]                            | 0.04 [0.04 0.05] | 0.12 [0.11 0.16] |                    |
| <b>HDL-C</b>         | Raw mean               | 52.9 ± 14.5                                 | 53.8 ± 15        | 55.9 ± 15.7      |                    |
| <b>(mg/dL)</b>       | Adj. mean <sup>1</sup> | 52.9 [52.5 53.3]                            | 53.8 [53.3 54.3] | 55.5 [55.1 55.9] | <.0001             |
|                      | Adj. mean <sup>2</sup> | 54.4 [53.8 55]                              | 53.8 [53.3 54.4] | 53.9 [53.3 54.6] | 0.30               |
| <b>ApoA1</b>         | Raw mean               | 149 ± 25                                    | 152 ± 25         | 154 ± 26         |                    |
| <b>(mg/dL)</b>       | Adj. mean <sup>1</sup> | 149 [149 150]                               | 152 [151 152]    | 153 [152 154]    | <.0001             |
|                      | Adj. mean <sup>2</sup> | 152 [151 153]                               | 151 [150 152]    | 150 [149 151]    | 0.02               |
| <b>HDL Size</b>      | Geom. mean             | 9.17 [9.16 9.19]                            | 9.18 [9.16 9.2]  | 9.25 [9.24 9.27] |                    |
| <b>(Ø nm)</b>        | Adj. mean <sup>1</sup> | 9.18 [9.16 9.19]                            | 9.18 [9.16 9.2]  | 9.24 [9.23 9.26] | <.0001             |
|                      | Adj. mean <sup>2</sup> | 9.23 [9.21 9.25]                            | 9.19 [9.17 9.2]  | 9.2 [9.18 9.22]  | 0.55               |
| <b>HDL Particles</b> |                        |                                             |                  |                  |                    |
| <b>Total</b>         | Geom. mean             | 36.6 [36.4 36.8]                            | 37.1 [36.9 37.4] | 37.2 [37 37.4]   |                    |
| <b>(µm/L)</b>        | Adj. mean <sup>1</sup> | 36.7 [36.5 36.9]                            | 37.1 [36.9 37.3] | 37 [36.8 37.2]   | 0.44               |
|                      | Adj. mean <sup>2</sup> | 37 [36.7 37.3]                              | 37 [36.7 37.2]   | 36.5 [36.2 36.8] | 0.004              |
| <b>Large</b>         | Geom. mean             | 5.32 [5.24 5.4]                             | 5.42 [5.32 5.53] | 5.86 [5.77 5.96] |                    |
| <b>(µm/L)</b>        | Adj. mean <sup>1</sup> | 5.35 [5.27 5.43]                            | 5.41 [5.3 5.51]  | 5.76 [5.67 5.86] | <.0001             |
|                      | Adj. mean <sup>2</sup> | 5.66 [5.53 5.8]                             | 5.44 [5.33 5.55] | 5.47 [5.33 5.61] | 0.16               |
| <b>Medium</b>        | Geom. mean             | 11.3 [11.1 11.4]                            | 11.4 [11.2 11.6] | 11.3 [11.1 11.5] |                    |
| <b>(µm/L)</b>        | Adj. mean <sup>1</sup> | 11.5 [11.3 11.6]                            | 11.4 [11.2 11.6] | 11.1 [10.9 11.3] | 0.01               |
|                      | Adj. mean <sup>2</sup> | 11.5 [11.2 11.8]                            | 11.3 [11.1 11.6] | 10.9 [10.7 11.2] | 0.01               |
| <b>Small</b>         | Geom. mean             | 17.6 [17.5 17.8]                            | 17.8 [17.6 18]   | 17.5 [17.4 17.7] |                    |
| <b>(µm/L)</b>        | Adj. mean <sup>1</sup> | 17.5 [17.4 17.7]                            | 17.8 [17.7 18]   | 17.7 [17.5 17.9] | 0.70               |
|                      | Adj. mean <sup>2</sup> | 17.3 [17.1 17.6]                            | 17.7 [17.5 17.9] | 17.8 [17.5 18]   | 0.54               |

Raw means ± sd and geometric (Geom.) means [CI]. <sup>1</sup> Model 1: The adjusted means (Adj.) are estimated from linear regression models adjusted for age (continuous), total energy (quintiles), energy adjusted saturated fats (quintiles), energy adjusted monounsaturated fats (quintiles), energy adjusted *trans* fat (quintiles), energy adjusted total n-6 (quintiles) and energy adjusted proteins (quintiles).

<sup>2</sup> Model 2: Adjusted as in model 1 but including smoking (current, past, never), alcohol use (rarely/never, 1–3 drinks/month, 1–6 drinks/week, and 1 drinks/day), BMI (continuous), exercise (quintiles of metabolic equivalent task hours per week), menopausal status (premenopausal, uncertain, postmenopausal), use of HT (current, past/never), hypertension (systolic blood pressure of at least 140 mmHg, diastolic blood pressure of at least 90 mmHg), antihypertensive treatment (yes or no), hypercholesterolemia (total cholesterol of at least 240 mg/dL), treatment for high cholesterol (yes or no), parental history of CHD (yes or no), energy adjusted glycemic index (quintiles), multivitamin use (current, past and never), aspirin use (Current use > 1x/week), red meat consumption, fruits and vegetables consumption (both quintiles) and energy adjusted ALA and DHA fatty acids (both in quintiles)

**Table s11- HDL related variables. Strategy based on modelling energy adjusted variables.**

|                                  |                        | Quintile of energy adjusted DHA intake (gm) |                  |                  |                     |
|----------------------------------|------------------------|---------------------------------------------|------------------|------------------|---------------------|
|                                  |                        | Q1                                          | Q3               | Q5               | P <sub>linear</sub> |
|                                  |                        | 0.05 [0.03 0.06]                            | 0.12 [0.11 0.13] | 0.28 [0.24 0.35] |                     |
| <b>HDL-C</b><br><b>(mg/dL)</b>   | Raw mean               | 53 ± 14.6                                   | 54.2 ± 14.9      | 55.3 ± 15.3      |                     |
|                                  | Adj. mean <sup>1</sup> | 53.1 [52.7 53.5]                            | 54.3 [53.8 54.7] | 55.1 [54.7 55.6] | <.0001              |
|                                  | Adj. mean <sup>2</sup> | 53.3 [52.7 54]                              | 54.6 [54.2 55.1] | 55 [54.3 55.7]   | 0.02                |
| <b>ApoA1</b><br><b>(mg/dL)</b>   | Raw mean               | 150 ± 25                                    | 152 ± 25         | 153 ± 26         |                     |
|                                  | Adj. mean <sup>1</sup> | 150 [149 150]                               | 152 [151 152]    | 153 [152 154]    | <.0001              |
|                                  | Adj. mean <sup>2</sup> | 150 [149 151]                               | 152 [151 153]    | 153 [152 154]    | 0.004               |
| <b>HDL Size</b><br><b>(Ø nm)</b> | Geom. mean             | 9.17 [9.16 9.18]                            | 9.19 [9.17 9.2]  | 9.23 [9.22 9.25] |                     |
|                                  | Adj. mean <sup>1</sup> | 9.18 [9.16 9.19]                            | 9.19 [9.18 9.2]  | 9.22 [9.21 9.24] | <.0001              |
|                                  | Adj. mean <sup>2</sup> | 9.17 [9.15 9.19]                            | 9.21 [9.19 9.22] | 9.24 [9.21 9.26] | 0.002               |
| <b>HDL Particles</b>             |                        |                                             |                  |                  |                     |
| <b>Total</b><br><b>(µm/L)</b>    | Geom. mean             | 36.7 [36.6 36.9]                            | 37 [36.8 37.2]   | 37.1 [36.9 37.3] |                     |
|                                  | Adj. mean <sup>1</sup> | 36.9 [36.7 37]                              | 37 [36.8 37.2]   | 36.9 [36.7 37.1] | 0.58                |
|                                  | Adj. mean <sup>2</sup> | 36.9 [36.6 37.2]                            | 37 [36.8 37.1]   | 37.1 [36.8 37.4] | 0.29                |
| <b>Large</b><br><b>(µm/L)</b>    | Geom. mean             | 5.32 [5.25 5.4]                             | 5.48 [5.39 5.57] | 5.72 [5.62 5.82] |                     |
|                                  | Adj. mean <sup>1</sup> | 5.36 [5.28 5.44]                            | 5.48 [5.4 5.57]  | 5.65 [5.55 5.74] | <.0001              |
|                                  | Adj. mean <sup>2</sup> | 5.33 [5.2 5.45]                             | 5.57 [5.48 5.66] | 5.74 [5.58 5.9]  | 0.002               |
| <b>Medium</b><br><b>(µm/L)</b>   | Geom. mean             | 11.3 [11.2 11.5]                            | 11.3 [11.1 11.5] | 11.3 [11.1 11.5] |                     |
|                                  | Adj. mean <sup>1</sup> | 11.5 [11.4 11.7]                            | 11.3 [11.1 11.5] | 11.1 [10.9 11.2] | 0.005               |
|                                  | Adj. mean <sup>2</sup> | 11.4 [11.2 11.7]                            | 11.3 [11.1 11.4] | 11.3 [11 11.6]   | 0.94                |
| <b>Small</b><br><b>(µm/L)</b>    | Geom. mean             | 17.7 [17.6 17.9]                            | 17.8 [17.7 18]   | 17.6 [17.4 17.7] |                     |
|                                  | Adj. mean <sup>1</sup> | 17.6 [17.5 17.7]                            | 17.8 [17.6 18]   | 17.7 [17.6 17.9] | 0.53                |
|                                  | Adj. mean <sup>2</sup> | 17.7 [17.5 18]                              | 17.7 [17.5 17.9] | 17.5 [17.2 17.8] | 0.33                |

Raw means ± sd and geometric (Geom.) means [CI]. <sup>1</sup> Model 1: The adjusted means (Adj.) are estimated from linear regression models adjusted for age (continuous), total energy (quintiles), energy adjusted saturated fats (quintiles), energy adjusted monounsaturated fats (quintiles), energy adjusted *trans* fat (quintiles), energy adjusted total n-6 (quintiles) and energy adjusted proteins (quintiles).

<sup>2</sup> Model 2: Adjusted as in model 1 but including smoking (current, past, never), alcohol use (rarely/never, 1–3 drinks/month, 1–6 drinks/week, and 1 drinks/day), BMI (continuous), exercise (quintiles of metabolic equivalent task hours per week), menopausal status (premenopausal, uncertain, postmenopausal), use of HT (current, past/never), hypertension (systolic blood pressure of at least 140 mmHg, diastolic blood pressure of at least 90 mmHg), antihypertensive treatment (yes or no), hypercholesterolemia (total cholesterol of at least 240 mg/dL), treatment for high cholesterol (yes or no), parental history of CHD (yes or no), energy adjusted glycemic index (quintiles), multivitamin use (current, past and never), aspirin use (Current use > 1x/week), red meat consumption, fruits and vegetables consumption (both quintiles) and energy adjusted ALA and EPA fatty acids (both in quintiles).

**Table s12- HDL related variables. Strategy based on modelling energy adjusted variables.**

|                      |                        | Quintile of energy adjusted ALA intake (gm) |                  |                  |                    |
|----------------------|------------------------|---------------------------------------------|------------------|------------------|--------------------|
|                      |                        | Q1                                          | Q3               | Q5               | P <sub>Trend</sub> |
|                      |                        | 0.79 [0.71 0.84]                            | 1.12 [1.08 1.16] | 1.61 [1.5 1.79]  |                    |
| <b>HDL-C</b>         | Raw mean               | 53.5 ± 14.6                                 | 53.9 ± 15        | 54.3 ± 15.2      |                    |
| <b>(mg/dL)</b>       | Adj. mean <sup>1</sup> | 53.7 [53.2 54.2]                            | 54 [53.6 54.5]   | 53.9 [53.4 54.4] | 0.83               |
|                      | Adj. mean <sup>2</sup> | 53.8 [53.3 54.3]                            | 54 [53.6 54.4]   | 54.1 [53.6 54.7] | 0.48               |
| <b>ApoA1</b>         | Raw mean               | 150 ± 25                                    | 151 ± 25         | 152 ± 26         |                    |
| <b>(mg/dL)</b>       | Adj. mean <sup>1</sup> | 151 [150 151]                               | 151 [151 152]    | 151 [150 152]    | 0.51               |
|                      | Adj. mean <sup>2</sup> | 151 [150 152]                               | 151 [151 152]    | 151 [150 152]    | 0.50               |
| <b>HDL Size</b>      | Geom. mean             | 9.2 [9.19 9.21]                             | 9.18 [9.17 9.2]  | 9.19 [9.18 9.21] |                    |
| <b>(Ø nm)</b>        | Adj. mean <sup>1</sup> | 9.18 [9.16 9.19]                            | 9.19 [9.17 9.2]  | 9.21 [9.19 9.22] | 0.08               |
|                      | Adj. mean <sup>2</sup> | 9.18 [9.17 9.2]                             | 9.2 [9.18 9.21]  | 9.22 [9.2 9.24]  | 0.01               |
| <b>HDL Particles</b> |                        |                                             |                  |                  |                    |
| <b>Total</b>         | Geom. mean             | 36.9 [36.7 37]                              | 37 [36.8 37.2]   | 37 [36.8 37.1]   |                    |
| <b>(µm/L)</b>        | Adj. mean <sup>1</sup> | 37 [36.8 37.3]                              | 37 [36.8 37.2]   | 36.7 [36.5 37]   | 0.10               |
|                      | Adj. mean <sup>2</sup> | 37 [36.8 37.3]                              | 37 [36.8 37.2]   | 36.7 [36.5 36.9] | 0.09               |
| <b>Large</b>         | Geom. mean             | 5.4 [5.32 5.49]                             | 5.44 [5.35 5.53] | 5.55 [5.46 5.64] |                    |
| <b>(µm/L)</b>        | Adj. mean <sup>1</sup> | 5.37 [5.27 5.48]                            | 5.46 [5.37 5.55] | 5.52 [5.41 5.64] | 0.19               |
|                      | Adj. mean <sup>2</sup> | 5.41 [5.31 5.51]                            | 5.5 [5.42 5.58]  | 5.59 [5.48 5.7]  | 0.07               |
| <b>Medium</b>        | Geom. mean             | 11.6 [11.5 11.8]                            | 11.3 [11.1 11.4] | 11 [10.9 11.2]   |                    |
| <b>(µm/L)</b>        | Adj. mean <sup>1</sup> | 11.5 [11.3 11.7]                            | 11.3 [11.1 11.5] | 11.2 [11 11.4]   | 0.09               |
|                      | Adj. mean <sup>2</sup> | 11.4 [11.2 11.6]                            | 11.3 [11.2 11.5] | 11.2 [11 11.4]   | 0.31               |
| <b>Small</b>         | Geom. mean             | 17.3 [17.2 17.5]                            | 17.8 [17.7 18]   | 17.9 [17.8 18.1] |                    |
| <b>(µm/L)</b>        | Adj. mean <sup>1</sup> | 17.7 [17.5 17.9]                            | 17.8 [17.7 18]   | 17.6 [17.4 17.8] | 0.23               |
|                      | Adj. mean <sup>2</sup> | 17.8 [17.6 18]                              | 17.7 [17.5 17.9] | 17.4 [17.2 17.6] | 0.03               |

Raw means ± sd and geometric (Geom.) means [CI]. <sup>1</sup> Model 1: The adjusted means (Adj.) are estimated from linear regression models adjusted for age (continuous), total energy (quintiles), energy adjusted saturated fats (quintiles), energy adjusted monounsaturated fats (quintiles), energy adjusted *trans*-fat (quintiles), energy adjusted total n-6 (quintiles) and energy adjusted proteins (quintiles).

<sup>2</sup> Model 2: Adjusted as in model 1 but including smoking (current, past, never), alcohol use (rarely/never, 1–3 drinks/month, 1–6 drinks/week, and 1 drinks/day), BMI (continuous), exercise (quintiles of metabolic equivalent task hours per week), menopausal status (premenopausal, uncertain, postmenopausal), use of HT (current, past/never), hypertension (systolic blood pressure of at least 140 mmHg, diastolic blood pressure of at least 90 mmHg), antihypertensive treatment (yes or no), hypercholesterolemia (total cholesterol of at least 240 mg/dL), treatment for high cholesterol (yes or no), parental history of CHD (yes or no), energy adjusted glycemic index (quintiles), multivitamin use (current, past and never), aspirin use (Current use > 1x/week), red meat consumption, fruits and vegetables consumption (both quintiles) and energy adjusted EPA and DHA fatty acids (both in quintiles).

**Table s13- Correspondence between absolute values and per 1% and per 5% differences.**

|                |         | Absolute values | 1% differences | 5 % differences |
|----------------|---------|-----------------|----------------|-----------------|
| LDL-C          | (mg/dL) | 123             | 1.23           | 6.17            |
| TC             | (mg/dL) | 210             | 2.10           | 10.51           |
| ApoB100        | (mg/dL) | 103             | 1.03           | 5.16            |
| LDL Size       | (Ø nm)  | 21              | 0.21           | 1.05            |
| LDL Particles  |         |                 |                |                 |
| Total          | (nm/L)  | 1188            | 11.88          | 59.38           |
| IDL            | (nm/L)  | 151             | 1.51           | 7.56            |
| Large          | (nm/L)  | 460             | 4.60           | 22.98           |
| Small A        | (nm/L)  | 60              | 0.06           | 3.00            |
| Small B        | (nm/L)  | 658             | 6.58           | 32.90           |
| TG             | (mg/dL) | 123             | 1.23           | 6.15            |
| VLDL Size      | (Ø nm)  | 52              | 0.52           | 2.58            |
| VLDL Particles |         |                 |                |                 |
| Total          | (nm/L)  | 55              | 0.55           | 2.77            |
| Large          | (nm/L)  | 3               | 0.03           | 0.14            |
| Medium         | (nm/L)  | 13              | 0.13           | 0.65            |
| Small          | (nm/L)  | 35              | 0.35           | 1.75            |
| VLDL-TG        | (mg/dL) | 75              | 0.75           | 3.77            |
| HDL-C          | (mg/dL) | 53              | 0.53           | 2.66            |
| ApoA1          | (mg/dL) | 150             | 1.50           | 7.49            |
| HDL Size       | (Ø nm)  | 9               | 0.09           | 0.46            |
| HDL Particles  |         |                 |                |                 |
| Total          | (µm/L)  | 37              | 0.37           | 1.84            |
| Large          | (µm/L)  | 5               | 0.05           | 0.27            |
| Medium         | (µm/L)  | 12              | 0.12           | 0.58            |
| Small          | (µm/L)  | 17              | 0.17           | 0.87            |

The absolute values are the raw mean values of the n-3 1<sup>st</sup> quintile intake.



**Table s14- Adjusted means (95% CI) for the lower exposure quintiles (Q1) that showed a significant association (Ptrend<0.05).**

|                             | Fish                | n-3                 | EPA              | DHA                 | ALA                 |
|-----------------------------|---------------------|---------------------|------------------|---------------------|---------------------|
| TC (mg/dL)                  | 210 (210–211)       |                     |                  |                     |                     |
| Apo B100 (mg/dL)            | 102 (102–103)       |                     |                  |                     |                     |
| LDL-C (mg/dL)               | 123 (122–124)       |                     |                  |                     | 125 (124–126)       |
| LDL particles (nm/L)        | 1189 (1173–1198)    |                     |                  |                     |                     |
| Large LDL particles (nm/L)  | 469 (460–479)       | 458 (447–470)       |                  | 479 (465–492)       |                     |
| LDL size (nm)               | 21.06 (21.04–21.08) | 21.03 (21.01–21.05) |                  | 21.07 (21.04–21.09) | 21.05 (21.03–21.07) |
| TG (mg/dL)                  | 123 (122–124)       | 124 (123–125)       |                  |                     |                     |
| VLDL-TG (mg/dL)             | 75.6 (74.6–76.6)    | 76.6 (75.4–77.9)    | 74.2 (72.7–75.9) |                     |                     |
| Total VLDL particles (nm/L) | 56.2 (55.5–56.9)    | 57 (56.2–57.9)      | 55.9 (54.8–57.1) |                     |                     |
| Large VLDL particles (nm/L) | 2.62 (2.55–2.7)     | 2.69 (2.6–2.78)     |                  |                     | 2.56 (2.47–2.66)    |
| HDL-C (mg/dL)               |                     |                     |                  | 53.3 (52.7–54)      |                     |
| Large HDL particles (µm/L)  |                     | 5.37 (5.28–5.47)    |                  | 5.33 (5.2–5.45)     |                     |
| HDL size (nm)               |                     | 9.17 (9.16–9.19)    |                  | 9.17 (9.15–9.19);   | 9.18 (9.17–9.2)     |

The means were adjusted for all demographic, clinical, and dietary factors. Blank spaces indicate no significant association (fish: Q1, n=5839; Q5, n=5617; n-3: Q1, n=5248; Q5, n=5123; EPA: Q1, n=5370; Q5, n=4947; 6 DHA: Q1, n=6351; Q5, n=4797; ALA: Q1, n=5286; Q5, n=5097). ALA indicates a-linolenic acid; Apo, apolipoprotein; DHA, docosahexaenoic acid; EPA, eicosapentaenoic acid; TC, total cholesterol; LDL, low density lipoprotein; LDL-C, low-density lipoprotein cholesterol; TG, triglycerides; VLDL, very low-density lipoprotein; HDL, high-density lipoprotein; HDL-C, high-density lipoprotein cholesterol.
